# Supplementary material
Source: ML conference proceedings conference paper supplement (https://openreview.net/forum?id=8bM7MkxJee)

**a**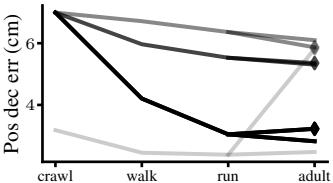**b**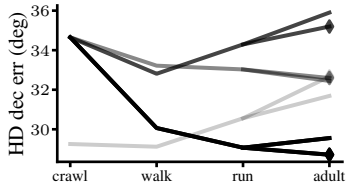**c**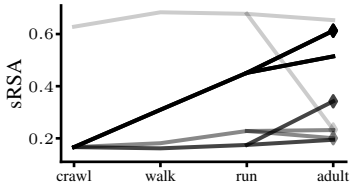

Supplement: supplementary_material [file compare_alternative_hyp.pdf › movement2cogmaps/paper_figures/compare_alternative_hyp.pdf]

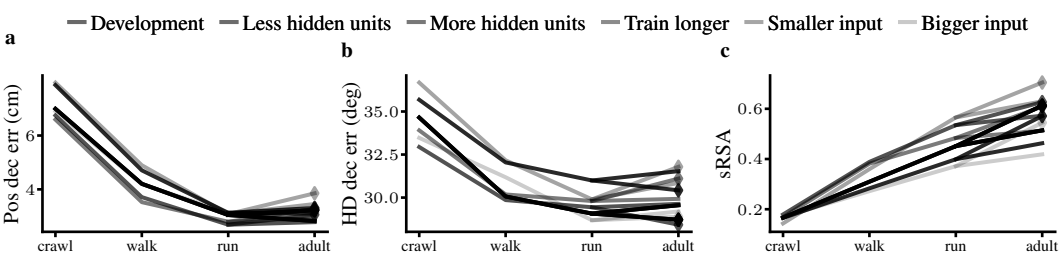

Supplement: supplementary_material [file compare_param_sweep.pdf › movement2cogmaps/paper_figures/compare_param_sweep.pdf]

**a**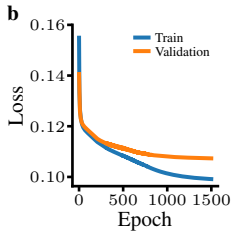**c**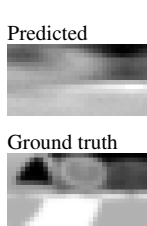**d**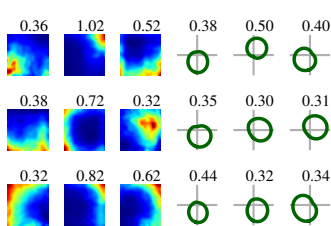

Supplement: supplementary_material [file figure2.pdf › movement2cogmaps/paper_figures/figure2.pdf]

**a**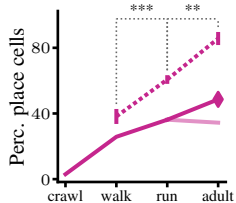**b**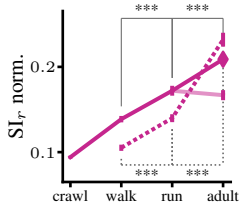**c**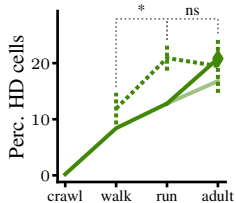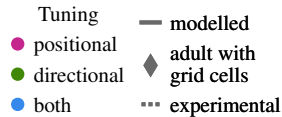**d**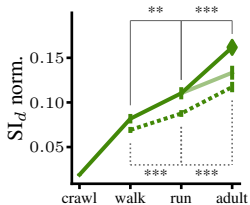**e**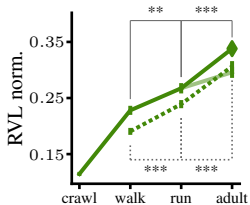**f**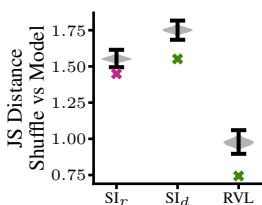**g**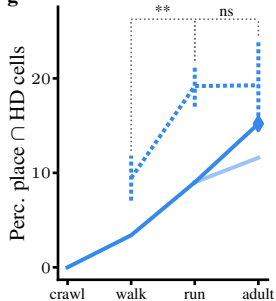

Supplement: supplementary_material [file figure_develop_min_max_global.pdf › movement2cogmaps/paper_figures/figure_develop_min_max_global.pdf]

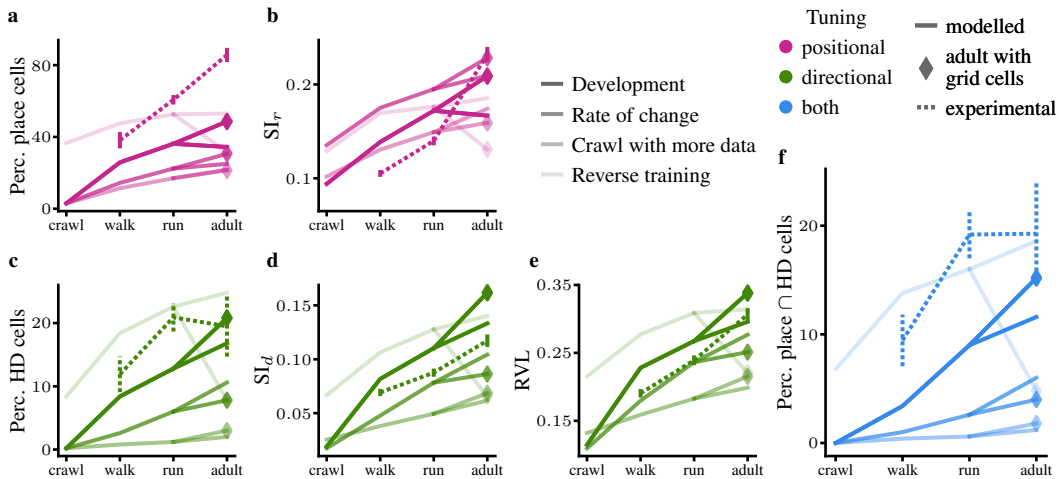

Supplement: supplementary_material [file figure_develop_min_max_global_alternative_hyp.pdf › movement2cogmaps/paper_figures/figure_develop_min_max_global_alternative_hyp.pdf]

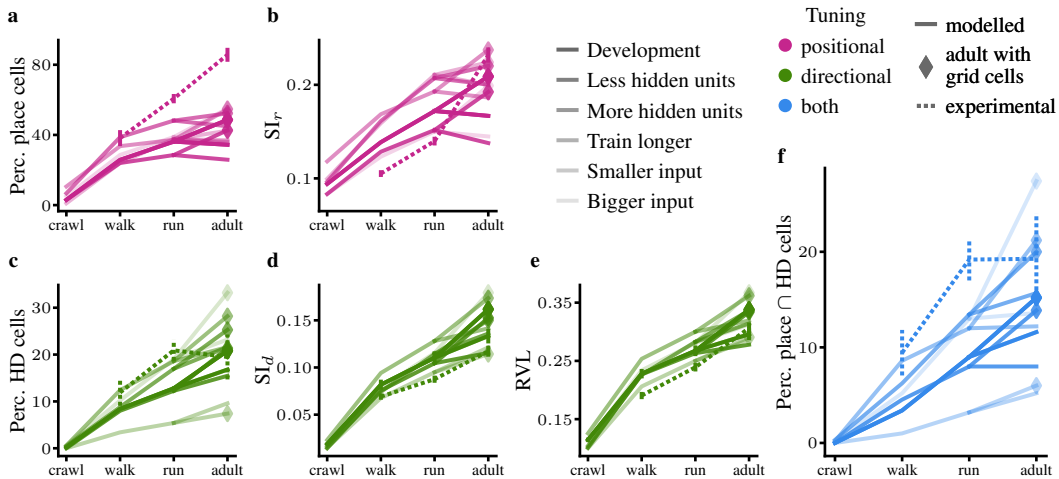

Supplement: supplementary_material [file figure_develop_min_max_global_parameter_sweep.pdf › movement2cogmaps/paper_figures/figure_develop_min_max_global_parameter_sweep.pdf]

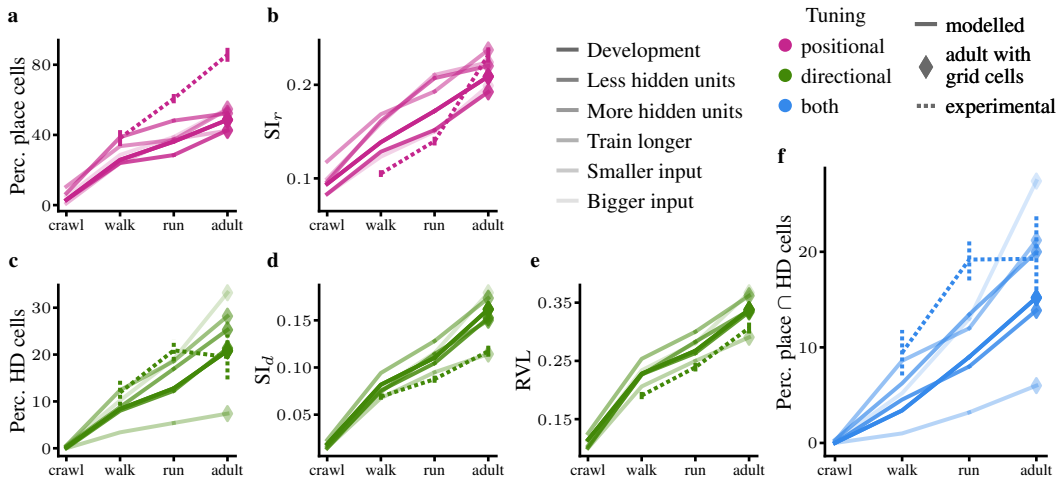

Supplement: supplementary_material [file figure_develop_min_max_global_parameter_sweep_onlygc.pdf › movement2cogmaps/paper_figures/figure_develop_min_max_global_parameter_sweep_onlygc.pdf]

Model:

— development — rate of change ◆ with grid cells

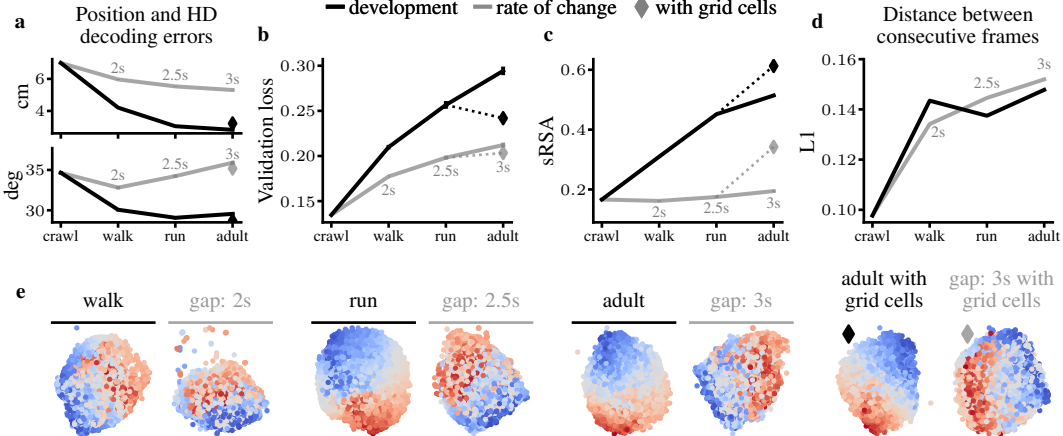

Supplement: supplementary_material [file figure_roc_comparison.pdf › movement2cogmaps/paper_figures/figure_roc_comparison.pdf]

**adult + grid cells**

**e**

Real

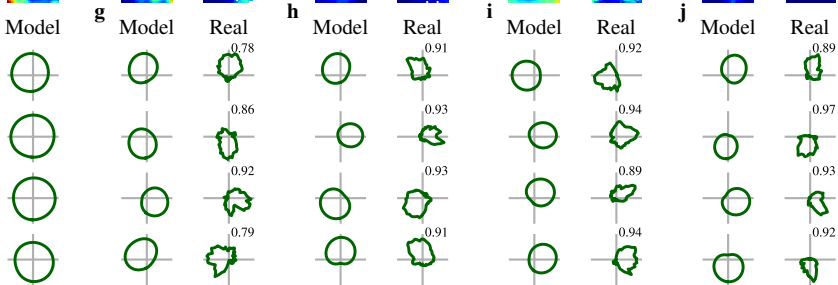

Supplement: supplementary_material [file neurons_rm_pm.pdf › movement2cogmaps/paper_figures/neurons_rm_pm.pdf]

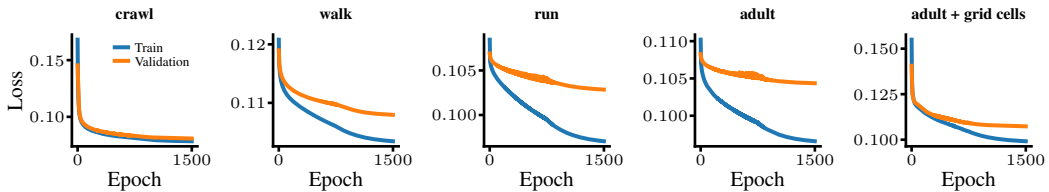

Supplement: supplementary_material [file suppfig_losses.pdf › movement2cogmaps/paper_figures/suppfig_losses.pdf]
